# Supplementary material for: Assessing economic impact of research and innovation originating from public research institutions and universities—case of Singapore PRIs
Source: Springer Nature journal article supplement (doi:10.1186/s40604-016-0037-6), 2016-04-13
Supplement: MOESM1 [file 11901898]

## Multilingual abstracts: Arabic

Assessing Economic Impact of Research and Innovation originating from Public Research Institutions and Universities - case of Singapore PRIs

Sarah Cheah, Christopher Yu

تقييم الآثار الاقتصادية للبحوث والابتكار الصادرة عن مؤسسات البحث العامة والجامعات-حالة "مؤسسات جامعة سنغافورة PRI/

الكاتب (ة) : Sarah Cheah , Christopher Yu

### ملخص

تساهم أنشطة البحث والابتكار من الجامعات ومعاهد البحوث العامة بشكل فعال في النمو الاقتصادي. ونظرا للاستثمارات الضخمة في البحوث والتنمية في القطاعين العام والخاص على حد سواء، فإنه من الضروري لصانعي السياسات أن يعتمدوا على مقاييس ذات مغزى وذات صبغة عملية لقياس أثر التمويل العام للبحث والابتكار. ولكن، يبدو ان تعريف الأثر وقياساته يختلف من بحث الى اخر، مما يجعل من الصعب بالنسبة للدارسين وصانعي السياسة إبلاغ السياسات وتوجيه البحوث المستقبلية. تهدف هذه الورقة لتوحيد الابحاث لدراسات الآثار الاقتصادية للبحوث والابتكار الموجودة في جامعة PRI، تحليل وحوصلة الدراسات المتباينة ومناقشة المقاييس الحالية ومصيرها، وتحديد الفجوات بين البحوث المختلفة. تكمن الإضافة بالنسبة لدراستنا في تقديم إطار متعدد المستويات لتقييم الأثر الاقتصادي للأبحاث المنجزة في القطاع العام بالاعتماد على نظرية النمو الذاتية و "المراوح الثلاثة". في هذا سياق، قمنا بتوظيف النظرية الاقتصادية لتكلفة التداول ومفهوم القيمة الحالية الصافية لاقتراح مؤشر جديد: القيمة التجارية المتحصل عليها للمدخلات. بينا تجريبيًا أن المؤشر الجديد المقترح أفضل من قياس الإيرادات المستخدم تقليديًا من قبل جامعة PRI مما دفع الشركات إلى تكرار اتفاق الترخيص معها، مما يشير إلى أثر الابتكار الأكاديمي.
